# Supplementary material
Source: PubMed Central journal article supplement (PMC3485937)
Supplement: AEM.01953-12_zam999103829so1.pdf [file AEM.01953-12_zam999103829so1.pdf]

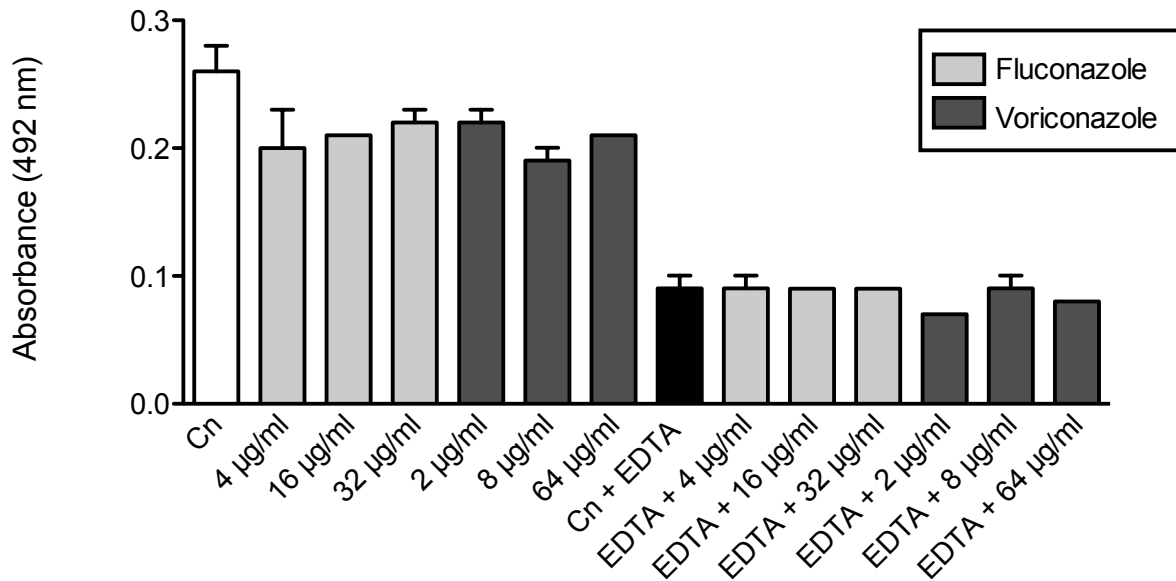

**Supplementary Figure 1. EDTA-treatment does not make *C. neoformans* biofilms more susceptible to antifungal drug action.** *C. neoformans* were resuspended in biofilm inducing media containing either fluconazole (4, 16, 32 g/ml) or voriconazole (2, 8, 64 g/ml) alone, or antifungal drug plus 0.025 mM EDTA, and grown for 24 h. Untreated biofilms (Cn) and cells treated with 0.025 mM EDTA alone (Cn + EDTA) were included. Biofilm growth was determined using XTT viability assay.
